# Supplementary material for: Tumour stage, treatment, and survival of women with high-grade serous tubo-ovarian cancer in UKCTOCS: an exploratory analysis of a randomised controlled trial
Source: PubMed Central journal article supplement (PMC7616829; doi:10.1016/s1470-2045(23)00335-2), 2023-09-01
Supplement: EMS200031-supplement-Supplementary_Material.pdf [file EMS200031-supplement-Supplementary_Material.pdf]

# THE LANCET Oncology

## Supplementary appendix

This appendix formed part of the original submission and has been peer reviewed. We post it as supplied by the authors.

Supplement to: Menon U, Gentry-Maharaj A, Burnell M, et al. Tumour stage, treatment, and survival of women with high-grade serous tubo-ovarian cancer in UKCTOCS: an exploratory analysis of a randomised controlled trial. *Lancet Oncol* 2023; **24**: 1018–28.

# Contents

|    |                                                                                                                                                                                  |    |
|----|----------------------------------------------------------------------------------------------------------------------------------------------------------------------------------|----|
| A. | Web Table 1: Morphology, stage and treatment of high grade serous tubo-ovarian cancer (HGSC) diagnosed between randomisation and 31 December 2014 .....                          | 2  |
| B. | Web Table 2: Morphology, stage and treatment of non-high grade serous epithelial ovarian cancer (non HGSC) diagnosed between randomisation and 31 December 2014 .....            | 5  |
| C. | Web Table 3: Baseline characteristics of women with tubo-ovarian cancer diagnosed between randomisation and 31 December 2014 .....                                               | 8  |
| D. | Web Figure 1: Cumulative incidence (95% confidence bands) of nonhigh grade serous ovarian cancer (non-HGSC) from randomisation till 31 December 2014 by randomisation group..... | 9  |
| E. | UKCTOCS committees and teams.....                                                                                                                                                | 10 |

**A. Web Table 1: Morphology, stage and treatment of high grade serous tubo-ovarian cancer (HGSC) diagnosed between randomisation and 31 December 2014**

| Characteristic, No. (% of cases)                                | No screening (C) group<br>(101314 women) |  | Multimodal (MMS) group<br>(50625 women) |                                           | Ultrasound (USS) group<br>(50623 women) |                                           |
|-----------------------------------------------------------------|------------------------------------------|--|-----------------------------------------|-------------------------------------------|-----------------------------------------|-------------------------------------------|
|                                                                 | C: Clinically diagnosed<br>520 (100)     |  | MMS: Screen<br>detected<br>153 (100)    | MMS: Clinically<br>diagnosed<br>106 (100) | USS: Screen<br>detected<br>81 (100)     | USS: Clinically<br>diagnosed<br>169 (100) |
| <b>Morphology</b>                                               |                                          |  |                                         |                                           |                                         |                                           |
| Serous, high grade                                              | 384 (74)                                 |  | 123 (80)                                | 74 (70)                                   | 65 (80)                                 | 125 (74)                                  |
| Carcinoma Nonspecific                                           | 89 (17)                                  |  | 15 (10)                                 | 23 (22)                                   | 7 (9)                                   | 33 (20)                                   |
| Carcinosarcoma                                                  | 34 (7)                                   |  | 3 (2)                                   | 4 (4)                                     | 3 (4)                                   | 9 (5)                                     |
| Endometrioid, high grade                                        | 13 (3)                                   |  | 12 (8)                                  | 5 (5)                                     | 6 (7)                                   | 2 (1)                                     |
| <b>FIGO 2014 Stage</b>                                          |                                          |  |                                         |                                           |                                         |                                           |
| Stage I                                                         | 34 (7)                                   |  | 27 (18)                                 | 10 (9)                                    | 11 (14)                                 | 7 (4)                                     |
| Stage II                                                        | 40 (8)                                   |  | 19 (12)                                 | 8 (8)                                     | 10 (12)                                 | 8 (5)                                     |
| Stage III                                                       | 325 (63)                                 |  | 95 (62)                                 | 61 (58)                                   | 53 (65)                                 | 102 (60)                                  |
| Stage IV                                                        | 118 (23)                                 |  | 12 (8)                                  | 26 (25)                                   | 7 (9)                                   | 52 (31)                                   |
| Unable to stage                                                 | 3 (1)                                    |  |                                         | 1 (1)                                     |                                         |                                           |
| Advanced stage (III/IV/unable to stage) by screening status     | 446 (86)                                 |  | 107 (70)                                | 88 (83)                                   | 60 (74)                                 | 154 (91)                                  |
| Advanced stage (III/IV/unable to stage) on Intention to screen* | 446 (86)                                 |  | 195 (75 of 259)                         |                                           | 214 (86 of 250)                         |                                           |
| <b>Treatment</b>                                                |                                          |  |                                         |                                           |                                         |                                           |
| <b>Stage Ia and Ib</b>                                          | <b>14 (100)</b>                          |  | <b>11 (100)</b>                         | <b>3 (100)</b>                            | <b>4 (100)</b>                          | <b>1 (100)</b>                            |
| Primary surgery with adjuvant chemotherapy                      | 9 (64)                                   |  | 6 (55)                                  | 2** (66)                                  | 3 (75)                                  |                                           |
| Primary surgery but no chemotherapy                             | 4 (29)                                   |  | 5 (45)                                  | 1 (33)                                    | 1 (25)                                  | 1 (100)                                   |
| Chemotherapy but no surgery                                     | 1*** (7)                                 |  |                                         |                                           |                                         |                                           |
| <b>Stage Ic and greater including unable to stage</b>           | <b>506 (100)</b>                         |  | <b>142 (100)</b>                        | <b>103 (100)</b>                          | <b>77 (100)</b>                         | <b>168 (100)</b>                          |
| Primary surgery with adjuvant chemotherapy                      | 192 (38)                                 |  | 108 (76)                                | 33 (32)                                   | 47 (61)                                 | 45 (27)                                   |

|                                                                     |                  |                  |                  |                 |                  |
|---------------------------------------------------------------------|------------------|------------------|------------------|-----------------|------------------|
| Neoadjuvant chemotherapy with interval debulking surgery            | 130 (26)         | 19 (13)          | 24 (23)          | 16 (21)         | 48 (29)          |
| Surgery but no chemotherapy                                         | 14 (3)           |                  | 3 (3)            | 2 (3)           | 4 (2)            |
| Chemotherapy but no surgery                                         | 129 (25)         | 13 (9)           | 23 (22)          | 11 (14)         | 53 (32)          |
| No surgery or chemotherapy                                          | 41 (8)           | 2 (1)            | 20 (19)          |                 | 18 (11)          |
| Surgery data present but chemo data missing                         |                  |                  |                  | 1 (1)           |                  |
| Women treated with surgery and chemotherapy by screening status     | 322 (64)         | 127 (89)         | 57 (55)          | 63 (82)         | 93 (55)          |
| Women treated with surgery and chemotherapy on Intention to screen* | 322 (64)         |                  | 184 (75 of 259)  |                 | 156 (64 of 250)  |
| Women treated with primary surgery by screening status              | 206 (41)         | 108 (76)         | 36 (35)          | 50 (65)         | 49 (29)          |
| Women treated with primary surgery on Intention to screen*          | 206 (41)         |                  | 144 (59 of 259)  |                 | 99 (40 of 250)   |
| <b>1st line chemotherapy agent</b>                                  |                  |                  |                  |                 |                  |
| <b>Stage Ia and Ib</b>                                              | <b>14 (100)</b>  | <b>11 (100)</b>  | <b>3 (100)</b>   | <b>4 (100)</b>  | <b>1 (100)</b>   |
| Combination chemotherapy****                                        | 3 (21)           | 1 (9)            | 1 (33)           |                 |                  |
| Single agent- platinum                                              | 7 (50)           | 5 (45)           | 1 (33)           | 2 (50)          |                  |
| Missing                                                             |                  |                  |                  | 1 (25)          |                  |
| Not Applicable                                                      | 4 (29)           | 5 (45)           | 1 (33)           | 1 (25)          | 1 (100)          |
| Women treated with combination chemotherapy by intention to screen  | 3 (21)           |                  | 2 (14 of 14)     |                 | 0 (0 of 5)       |
| <b>Stage Ic and greater including unable to stage</b>               | <b>506 (100)</b> | <b>142 (100)</b> | <b>103 (100)</b> | <b>77 (100)</b> | <b>168 (100)</b> |
| Combination chemotherapy****                                        | 290 (57)         | 92 (65)          | 48 (47)          | 49 (64)         | 93 (55)          |
| Single agent- platinum                                              | 149 (29)         | 45 (32)          | 30 (29)          | 22 (29)         | 48 (29)          |
| Missing                                                             | 11 (2)           | 3 (2)            | 2 (2)            | 4 (5)           | 5 (3)            |
| Not Applicable                                                      | 56 (11)          | 2 (1)            | 23 (22)          | 2 (3)           | 22 (13)          |
| Women treated with combination chemotherapy by intention to screen  | 290 (57)         |                  | 140 (57 of 245)  |                 | 142 (58 of 245)  |
| <b>Residual disease after surgery</b>                               |                  |                  |                  |                 |                  |
| 0 mm                                                                | 157 (30)         | 84 (55)          | 35 (33)          | 44 (54)         | 39 (23)          |
| >0 mm - 10 mm                                                       | 99 (19)          | 42 (27)          | 13 (12)          | 15 (19)         | 37 (22)          |
| >= 10 mm                                                            | 87 (17)          | 12 (8)           | 12 (11)          | 9 (11)          | 19 (11)          |
| Missing                                                             | 6 (1)            |                  | 3 (3)            | 2 (2)           | 3 (2)            |

|                                                  |          |                 |         |                |         |
|--------------------------------------------------|----------|-----------------|---------|----------------|---------|
| Not applicable                                   | 171 (33) | 15 (10)         | 43 (41) | 11 (14)        | 71 (42) |
| Women with zero residual on Intention to screen* | 157 (30) | 119 (46 of 259) |         | 83 (33 of 250) |         |

**NOTE.** \*For intention to screen analysis, screen detected and clinically diagnosed are combined for each screening group. \*\* Includes one woman who had completion surgery after chemotherapy. \*\*\* Prior to debulking surgery this woman suffered a stroke and deteriorated rapidly. \*\*\*\*Majority platinum and taxol, includes trial drugs

**Abbreviations:** HGSC, high grade serous ovarian carcinoma; MMS, multimodal screening; USS, ultrasound screening; FIGO, International Federation of Gynecology and Obstetrics.

**B. Web Table 2: Morphology, stage and treatment of non-high grade serous epithelial ovarian cancer (non HGSC) diagnosed between randomisation and 31 December 2014**

| Characteristics, No. (% of cases)                               | No screening (C ) group |  | Multimodal (MMS) group |                           | Ultrasound (USS) group |                           |
|-----------------------------------------------------------------|-------------------------|--|------------------------|---------------------------|------------------------|---------------------------|
|                                                                 | C: Clinically diagnosed |  | MMS: Screen detected   | MMS: Clinically diagnosed | USS: Screen detected   | USS: Clinically diagnosed |
|                                                                 | 93 (100)                |  | 27 (100)               | 25 (100)                  | 24 (100)               | 10 (100)                  |
| <b>Morphology</b>                                               |                         |  |                        |                           |                        |                           |
| Endometrioid, low grade                                         | 25 (27)                 |  | 10 (37)                | 8 (32)                    | 5 (21)                 | 2 (20)                    |
| Clear Cell                                                      | 21 (23)                 |  | 5 (19)                 | 11 (44)                   | 11 (46)                | 1 (10)                    |
| Serous, low grade                                               | 19 (20)                 |  | 11 (41)                | 1 (4)                     | 5 (21)                 | 3 (30)                    |
| Mucinous                                                        | 25 (27)                 |  | 1 (4)                  | 5 (20)                    | 3 (13)                 | 4 (40)                    |
| Mixed Cell                                                      | 2 (2)                   |  |                        |                           |                        |                           |
| Brenner                                                         | 1 (1)                   |  |                        |                           |                        |                           |
| <b>FIGO 2014 Stage</b>                                          |                         |  |                        |                           |                        |                           |
| Stage I                                                         | 62 (67)                 |  | 20 (74)                | 20 (80)                   | 17 (71)                | 5 (50)                    |
| Stage II                                                        | 12 (13)                 |  | 3 (11)                 | 2 (8)                     | 3 (13)                 |                           |
| Stage III                                                       | 16 (17)                 |  | 3 (11)                 | 3 (12)                    | 4 (17)                 | 4 (40)                    |
| Stage IV                                                        | 3 (3)                   |  | 1 (4)                  |                           |                        | 1 (10)                    |
| Advanced stage (III/IV/unable to stage) by screening status     | 19 (20)                 |  | 4 (15)                 | 3 (12)                    | 4 (17)                 | 5 (50)                    |
| Advanced stage (III/IV/unable to stage) on Intention to screen* | 19 (20)                 |  |                        | 7 (13 of 52)              |                        | 9 (26 of 34)              |
| <b>Treatment</b>                                                |                         |  |                        |                           |                        |                           |
| <b>Stage Ia and Ib</b>                                          | <b>24 (100)</b>         |  | <b>9 (100)</b>         | <b>10 (100)</b>           | <b>7 (100)</b>         | <b>4 (100)</b>            |
| Primary surgery with adjuvant chemotherapy                      | 8 (33)                  |  | 3 (33)                 | 2 (20)                    | 2 (29)                 |                           |
| Primary surgery but no chemotherapy                             | 16 (67)                 |  | 6 (67)                 | 8 (80)                    | 5 (71)                 | 4 (100)                   |
| Women treated with curative intent by intention to treat        | 24 (100)                |  | 19 (100 of 19)         |                           | 11 (100 of 11)         |                           |
| <b>Stage Ic and greater including unable to stage</b>           | <b>69 (100)</b>         |  | <b>18 (100)</b>        | <b>15 (100)</b>           | <b>17 (100)</b>        | <b>6 (100)</b>            |

|                                                              |                 |                 |                 |                 |                |
|--------------------------------------------------------------|-----------------|-----------------|-----------------|-----------------|----------------|
| Primary surgery with adjuvant chemotherapy                   | 57 (83)         | 14 (78)         | 13 (87)         | 16 (94)         | 3 (50)         |
| Neoadjuvant chemotherapy with interval debulking surgery     | 1 (1)           |                 |                 |                 | 1 (17)         |
| Primary surgery but no chemotherapy                          | 7 (10)          | 4 (22)          | 1 (7)           |                 | 1 (17)         |
| Chemotherapy but no surgery                                  | 2 (3)           |                 | 1 (7)           | 1 (6)           |                |
| No surgery or chemotherapy                                   | 2 (3)           |                 |                 |                 | 1 (17)         |
| Women treated with curative intent by screening status       | 58 (84)         | 14 (78)         | 13 (87)         | 16 (94)         | 4 (67)         |
| Women treated with curative intent on Intention to screen*   | 58 (84)         |                 | 27 (82 of 33)   |                 | 20 (87 of 23)  |
| Women treated with primary surgery on Intention to screen*   | 64 (93)         |                 | 32 (97 of 33)   |                 | 20 (87 of 23)  |
| <b>1st line chemotherapy agent</b>                           |                 |                 |                 |                 |                |
| <b>Stage Ia and Ib</b>                                       | <b>24 (100)</b> | <b>9 (100)</b>  | <b>10 (100)</b> | <b>7 (100)</b>  | <b>4 (100)</b> |
| Combination chemotherapy**                                   | 3 (13)          | 2 (22)          | 1 (10)          |                 |                |
| Single agent- platinum                                       | 5 (21)          | 1 (11)          | 1 (10)          | 2 (29)          |                |
| Not Applicable                                               | 16 (67)         | 6 (67)          | 8 (80)          | 5 (71)          | 4 (100)        |
| Women treated with platinum and taxol by intention to screen | 3 (13)          |                 | 3 (16 of 19)    |                 | 0 (0 of 11)    |
| <b>Stage Ic and greater including unable to stage</b>        | <b>69 (100)</b> | <b>18 (100)</b> | <b>15 (100)</b> | <b>17 (100)</b> | <b>6 (100)</b> |
| Combination chemotherapy**                                   | 31 (45)         | 5 (28)          | 8 (53)          | 10 (59)         | 1 (17)         |
| Single agent- platinum                                       | 28 (41)         | 8 (44)          | 6 (40)          | 7 (41)          | 3 (50)         |
| Missing                                                      | 1 (1)           | 1 (6)           |                 |                 |                |
| Not Applicable                                               | 9 (13)          | 4 (22)          | 1 (7)           |                 | 2 (33)         |
| Women treated with platinum and taxol by intention to screen | 31 (45)         |                 | 13 (39 of 33)   |                 | 11 (48 of 23)  |
| <b>Residual disease</b>                                      |                 |                 |                 |                 |                |
| 0 mm                                                         | 80 (86)         | 24 (89)         | 21 (84)         | 20 (83)         | 7 (70)         |
| >0 mm - 10 mm                                                | 6 (6)           | 2 (7)           | 1 (4)           | 2 (8)           | 1 (10)         |
| >= 10 mm                                                     | 3 (3)           | 1 (4)           | 2 (8)           | 1 (4)           |                |
| Missing                                                      |                 |                 |                 |                 | 1 (10)         |
| Not applicable                                               | 4 (4)           |                 | 1 (4)           | 1 (4)           |                |

|                                                  |         |               |               |
|--------------------------------------------------|---------|---------------|---------------|
| Women with zero residual on Intention to screen* | 80 (86) | 45 (87 of 52) | 27 (79 of 34) |
|--------------------------------------------------|---------|---------------|---------------|

**NOTE.** \* For intention to screen analysis, screen detected and clinically diagnosed are combined for each screening group.

\*\*Majority platinum and taxol, includes trial drugs.

**Abbreviations:** LGSC, low grade serous carcinoma; MMS, multimodal screening; USS, ultrasound screening; FIGO, International Federation of Gynecology and Obstetrics; ITT, intention to treat; mm, millimetres; NA, not applicable.



**C. Web Table 3: Baseline characteristics of women with tubo-ovarian cancer diagnosed between randomisation and 31 December 2014**

| Characteristic, n (%) or median (IQR) | No screening (C) group<br>(613 women) | Multimodal (MMS) group<br>(312 women) | Ultrasound (USS) group<br>(284 women) |
|---------------------------------------|---------------------------------------|---------------------------------------|---------------------------------------|
| Age at randomisation                  | 62.7 (57.3-67.4)                      | 62.5 (58.3-67.5)                      | 63.1 (58.5-68.0)                      |
| Ethnic origin                         |                                       |                                       |                                       |
| White                                 | 600 (97.9%)                           | 305 (97.8%)                           | 280 (98.6%)                           |
| Non-white                             | 7 (1.1%)                              | 3 (1.0%)                              | 1 (0.4%)                              |
| Other                                 | 4 (0.7%)                              | 3 (1.0%)                              | 2 (0.7%)                              |
| Missing                               | 2 (0.3%)                              | 1 (0.3%)                              | 1 (0.4%)                              |
| Hysterectomy                          | 120 (19.6%)                           | 59 (18.9%)                            | 53 (17.0%)                            |
| Ever use of OCP                       | 314 (51.3%)                           | 143 (45.8%)                           | 137 (43.9%)                           |
| Pregnancies <6 months                 | 0 (0-1)                               | 0 (0-1)                               | 0 (0-1)                               |
| Children (pregnancies >6 months)      | 2 (2-3)                               | 2 (2-3)                               | 2 (1-3)                               |
| Personal history of breast cancer     | 29 (4.7%)                             | 11 (3.5%)                             | 12 (3.8%)                             |
| Maternal history of ovarian cancer    | 13 (2.1%)                             | 6 (1.9%)                              | 6 (1.9%)                              |
| Maternal history of breast cancer     | 40 (6.5%)                             | 22 (7.1%)                             | 24 (7.7%)                             |
| Age at ovarian cancer diagnosis       | 68.3 (63.7-73.3)                      | 67.9 (63.0-72.8)                      | 68.8 (63.2-73.9)                      |

**Abbreviations:** IQR=inter quartile range; MMS=multimodal screening. USS=ultrasound screening. OCP=oral contraceptive pill.

**D. Web Figure 1: Cumulative incidence (95% confidence bands) of nonhigh grade serous ovarian cancer (non-HGSC) from randomisation till 31 December 2014 by randomisation group**

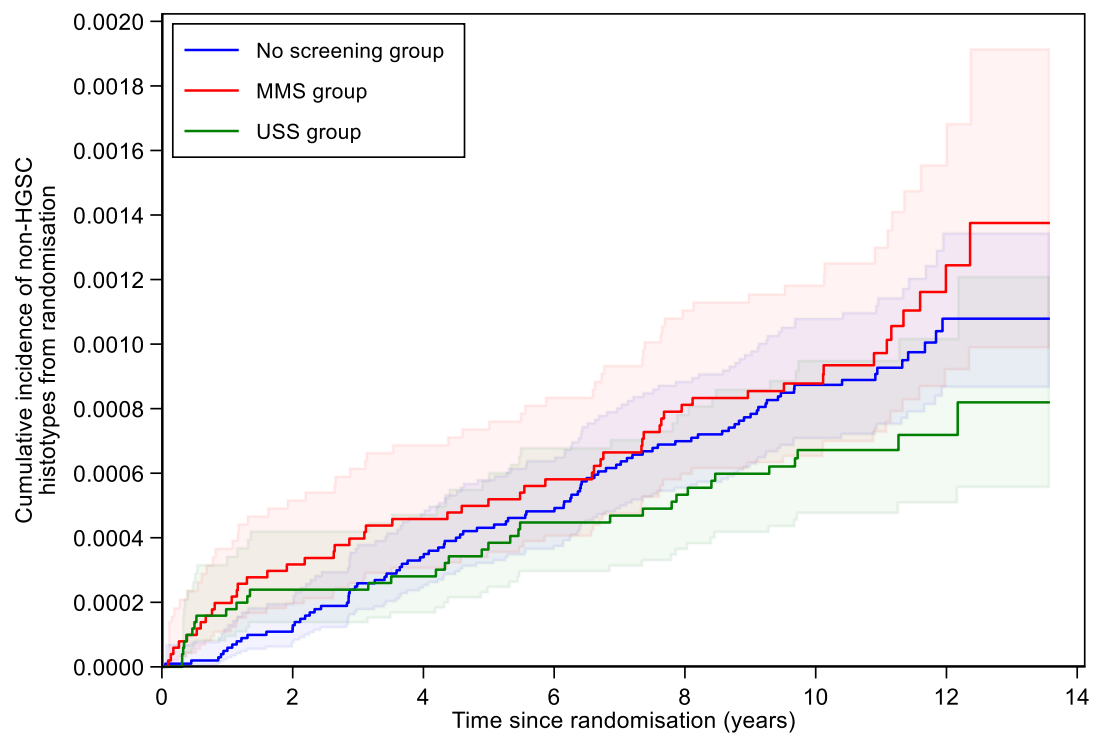

|              | Numbers at risk |      |        |      |       |      |       |      |       |      |       |     |       |     |   |
|--------------|-----------------|------|--------|------|-------|------|-------|------|-------|------|-------|-----|-------|-----|---|
| No screening | 101297          | (12) | 100339 | (22) | 98911 | (14) | 97202 | (21) | 95311 | (16) | 74033 | (8) | 24400 | (0) | 0 |
| MMS          | 50618           | (16) | 50046  | (7)  | 49277 | (6)  | 48322 | (11) | 47219 | (3)  | 36559 | (8) | 12055 | (1) | 0 |
| USS          | 50614           | (12) | 49199  | (2)  | 48295 | (8)  | 47350 | (4)  | 46241 | (6)  | 35820 | (1) | 11825 | (1) | 0 |

## **E. UKCTOCS committees and teams**

### **Trial investigators**

Prof U Menon (CI 2015-2021, co-CI 2001-2015), Prof I Jacobs (CI 2015-2021), Prof M Parmar OBE, Dr S Skates, Prof S Campbell, Prof A McGuire, Prof Dame L Fallowfield

### **Trial Steering Committee (2001-2021)**

Prof D Luesley (Independent Chair; 2001-2015), Prof H Kitchener (Independent Chair; 2016-2021), Prof J Patnick CBE (independent member), Prof J Cuzick (independent member), Ms L Bayne (independent member; 2001-2014), Ms Annwen Jones OBE (independent member; 2017-2021), Prof U Menon, Prof I Jacobs, Prof M Parmar OBE, Prof Dame L Fallowfield

### **Data Monitoring and Ethics Committee (2001-2014)**

Prof P Boyle (Chair), Prof APM Heintz, Prof S Kjaer, Dr Edward L Trimble

### **Trial Management Committee (2001-2021)**

Prof U Menon (Chair 2015-2021), Prof I Jacobs (Chair 2001-2014), Prof S Campbell, Prof Dame L Fallowfield, Prof A McGuire, Prof M Parmar OBE, Dr S Skates, Mr R Woolas, Mr T Mould, Dr N Singh, Dr A Dawnay, Dr A Gentry-Maharaj, Dr J Kalsi, Dr A Ryan, Dr M Burnell

### **Outcome Review Committee (2001-2021)**

Dr N Singh (Chair), Dr E Benjamin (2001-2014), Ms K Reynolds (2001-2005) , Prof M Widschwendter (2009-2014), Mr Rob Woolas, Prof Ranjit Manchanda (2017-2021), Mr Tim Mould (2001-2014), Ms Karin Williamson (2018-2021), Ms Aarti Sharma (2018-2021), Dr Rupali Arora (2019-2021), Dr Laura Casey (2020-2021)

### **Ultrasound Sub-Committee (2001-2014)**

Prof U Menon (Chair), Prof N Amso, Dr C Brunell, Prof S Campbell, Mrs G Fletcher, Ms K Ford, Dr A Gentry-Maharaj, Dr J Kalsi, Ms R Rangar, Dr A Ryan, Mr M Seif, Dr G Turner

## **Coordinating Centre Team**

Prof U Menon (Lead), M Ahmad, T Akbar, N Alves, Dr S Apostolidou, M Bacon, Dr C Brunell, Dr M Burnell, G Carlino, J Chapman, D Crump, J Cunningham, L Danquah, S Davies, Dr A Dawnay, A Dyer, J Ford, Dr A Gentry-Maharaj (Trial Manager 2017-2021), A Gibson, T Goodall, S Grant, R Gunu, M Habib, L Hadcocks, Dr R Hallett, N Hinkey, Dr J Kalsi (Trial Manager 2009-2017), C Karpinskyj, J Kerkhoff, Z Khan, S Lewis, W Liston, S Mohamed, L Odunlami, M Pamboris, S Philpott, T Roberts, Dr A Ryan, Dr A Sharma, J Sheals, K Sibley, C Spicer, S Spicer, L Sterry, C Stubbs, K Tamm, J Taylor, Dr F Warburton, Y Wold, T Roberts.

## **Regional Trial Centre Teams (n=number randomised)**

### Department of Gynaecological Oncology, St. Bartholomew's Hospital, London (n=19996)

D Oram (Lead), U Menon (Lead), J Ademi, C Amarasinghe, CM Baque-Juxton, S Bhola, J Bramble, J Chapman, J Charalambous, A Clough, L Cole, L Crosby, J Cunningham, E d'Tisi, E Ferrier, E Forde, P Goulding, B Heyer, J Jonsson, A Knowles, E Liu-Koo, AM Mackinson, V Medic, U Menon, A Relf, K Reynolds, B Rufford, E Ryan, S Sheik, C Stubbs, L Walters, D Warrington, J Webb.

### Department of Gynaecological Oncology, St. Mary's Hospital, Portsmouth (n=19180)

R Woolas (Lead), S Aldcock, M Anderson, E Barclay, ? Bell, R Bonner, E Bowes, D Brinkmann, J Burns, K Chorley, C Dhar, K Fairley, F Gardner, B Gibbs, Y Griffiths, R Harrison, L Hayward, C Ihezue, C Isaac, D James, F Jones, D Mason, E Merritt, R Morris, M Oakey, J Skinner, S Tilbury, J Turpitt, A Webb, C West, J Woolas.

### Northern Gynaecological Oncology Centre, Queen Elizabeth Hospital, Gateshead (n= 17326)

K Godfrey (Lead), A Lopes (Lead), J Callaghan, G Dorman, J Gibson, C Green, A Guest, A Harvey, P Kilbourn, A Kucukmetin, M Meirovitz, J Monaghan, R Rangar, N Rashid, A Richardson, B Sarker, M Sihkanyisiwe, A Tailor, G Thompson, G Wilson, B Wright, C Youlton, J Youlton.

### Department of Gynaecological Oncology, Nottingham City Hospital, Nottingham (n=16770)

K Williamson (Lead), E Bailey, V Barker, J Barkes, C Bower-Smith, A Bowley, C Bown, S Chowdhary, C Church, V Clements, S Colbeck, F Dack, B Gibbs, M Gill, V Hessom, C Hewitt, R Hutchinson, C Hynes, J Kythreotis, L Lacy, M Mahal, K Manderson, E Mercer, C Norris, D Nunns, C Oakley, T Parkes, C Reynolds, R Rock, H Rushbrook, C Sampson, K Sihra, S Sinclair, Z Thomas, S Thompson, S Vimplis, H Ward, N Ward, K Warner, G Wilson.

### Department of Obstetrics and Gynaecology, University of Wales College of Medicine, Cardiff (n=16758)

N Amso (Lead), S Basu, D Bell, H Clarke, A Evans, J Evans, T Griffiths, P Henderson, R Howells, R Jones, G Jose, G Looker, C Morgan, G Rieck, A Rogers, A Sharma, A Sims, S Underwood, D Williams, G Williams.

### Department of Gynaecological Oncology, Royal Free Hospital, London (n=16693)

T Mould (Lead), I Aitken, S Amin, I Beal, S Bhola, S Blackmoore, K Borroughs, H Brown, S Burke, D Colia, L Crosby, G Desai, C Efueye, H Evans, E Ferrier, K Fitzgerald, G Fletcher, C Fox, G Gaston, K Harvey, B Heyer, T Hitchen, K Isherwood, E Izard, E Koo, M Lagos, K Lakhani, AM Mackinson, L McKenzie, V Medic, S Mohamed, S More, K Muir, W Myburg, N Nayak, O Ojo, N Old, A Oldham, S Porcherot, E Rawstron, M Sharma, T Stevens, C Sundstrom, E Sweeney, J Terwin, D Townshend, F Turner, S Wellington, D White, J Wickes, L Young, E Zard.

*Department of Gynaecological Oncology, St. Michael's Hospital, Bristol (n=16574)*

J Murdoch (Lead), B Anderson, F Anderson, H Andrews, E Barrow, R Brown, J Chippett, A D'Angelo, K Gale, N Hammadih, K Henson, A Hobbs, K Horton-Fawkes, K Hunstman, T James, N Jeal, S King, E Langdon, M Lord, J Marsden-Williams, K McMillan, V Mitchell, K Nicholls, D Park, R Phillips, C Pretsell, RC Sanders, B Schaefer, C Shahin, S Shahin, S Sizer, P Taylor, M Tovey, N Vickers, S Wilmot.

*Academic Unit of Obstetrics and Gynaecology, St. Mary's Hospital, Manchester (n=16503)*

MW Seif (Lead), K Reynolds (Lead), G Atanga, S Atkinson, L Bailey, C Barber, P Bhakar, N Bhandari, A Blackman, K Bowden, S Briggs, J Brown, D Bushell, K Butler, S Charles, J Collins, M Condon, M Dale, M Doyle, J Dunscombe, R Elfin, R Elven, M Faheem-Siddiqui, MR Green, Z Griffiths, J Harris, N Harwood, J Hawnaur, H Haydock, S Heywood, P Hughes, L Ivers, S Kaye, C Kilkelly, J Lees, M Maheem, G Martin, S Mawn, S McDonald, M Moore, T Morgan, J Nelson, E Oughton, A Panteli, V Parker, J Peacock, C Philipps, J Prior, V Purnell, S Renshaw, L Roberts, S Robin, J Robinson, R Simpson, T Speakman, F Storton, S Subin, J Taylor, X Vanakara, A Webb, C Webb, C Wilde, M Williams, V Williams, A Wood, C Wood, H Wright.

*Department of Gynaecological Oncology, Derby City Hospital, Derby (n=14923)*

H Jenkins (Lead), I Scott (Lead), A Bali, J Barke, C Benson, C Bower-Smith, H Bullock, J Caborn, S Crockett, A Ferguson, G Forbes, J Gomes, R Harrison, C Hollins, M Jones, A North, R Rock, M Scott, H Stanton, S Thompson, M Tudge, G Turner, J Weston, C Williams.

*Department of Gynaecological Oncology, Llandudno Hospital, Llandudno, North Wales (n=14308)*

S Leeson (Lead), A Baker, V Byrne, C Chapman, B Davies, S Edwards, J Galley, L Griffiths, S Hogg, JY Houghton-Wright, M Howarth, K Hughes, M Hughes, H Jones, D Longley, A Roberts, L Sharpe, S Thomas, BJ Turner, B Warmington, B Waterson.

*Department of Gynaecological Oncology, Belfast City Hospital, Belfast (n=13575)*

S Dobbs (Lead), M Alkalbani, M Carey, J Caruth, M Clarke, J Forbes, M Gallagher, B Gibbs, M Hendron, R McClelland, M McComiskey, D Morgan, M Murray, A O'Donnell, C Poh, J Price, H Sheldon, M Yoong, A Zawislak.

*Department of Gynaecology, Liverpool Women's Hospital, Liverpool (n=10110)*

J Herod (Lead), C Atherton, T Aust, L Bailey, S Bassi, L Baty, M Brown, H Burgin, J Carter, J Chapman, B Cheetham, JP Conway, H Crocker, B Daniels, L Diment, A Drought, C Finnegan, K Ford, L Greenfield, S Hailward, J Hazelton, M Herod, S Inwood, S Jones, V Jones, L Korb, H Lee, L Limbert, K Lord, J Maloney, M Maraj, J McCarthy, L McGlynn, D Ndlela, J Newman, A Nicolson, K Pearson, S Pennington, D Petter, P Stewart, A Tannock, B Thomson, A Webster, J Webster, S West, H Wright, G Zabroski.

Department of Gynaecological Oncology, James Cook University Hospital, Middlesbrough (n=9922)

D Cruickshank (Lead), A Bullen, V Chadwick, K Chapman, J Francis, R Goldie, C Ikwana-McCabe, K Jan, D Khan, L Lewis, J Nevin, L Prentis, J Proll, R Shanbhag, G Tarry.
